# Supplementary material
Source: publisher figshare collection journal article supplement (https://gsapubs.figshare.com/ndownloader/files/24850556)
Supplement: Supplementary file 1 [file 24850556]

## Sheet: Sheet1
Supplemental Material for Ashworth, A.C., Thackray, G.D., and Gavin, D.G., 2020, Climate of the Last Glacial Maximum on the western Olympic Peninsula
based on insect paleoecology, palynology, and glacial geology, in Waitt, R.B., Thackray, G.D., and Gillespie, A.R., eds., Untangling the Quaternary Period:
A Legacy of Stephen C. Porter: Geological Society of America Special Paper 548, https://doi.org/10.1130/2020.2548(06).
S6. Modern collecting localities and associated mean July temperature (MJul) and mean January (MJan) data for Olophrum consimile
Campbell, 1983		Lat	LONG	EL m
12 mi E Hope	BC	49.401555°	-121.138	1392
Aklavik	NT	68.2222	-135.021	6
Prudhoe Bay Road	AK	66.9666	-150.377	414
Prudhoe Bay Rd, 2 mi S Grayling Lk, 150°25' , 66°55' , 1300 ft	AK	66.9532	-150.4	400
Mile 259 Dempster Hwy , Richardson Mts., 1900 ft	YT	66.8011	-136.336	579
Prudhoe Bay Rd, Fish Creek, 150 °50' , 66°32', 900 ft	AK	66.5387	-150.793	258
Mile 236 Dempster Hwy , Eagle River, 1400 ft ,	YT	66.4433	-136.71	426
Prudhoe Bay Rd , 35 mi N Yukon R, 150°08' , 66°07' , 600 ft	AK	66.1213	-150.132	201
Mile 147 Dempster Hwy, 1900 ft	YT	65.9207	-137.383	579
Prudhoe Bay Rd, 0.5 mi N Yukon R, 149°45' , 65°52' , 400 ft	AK	65.8894	-149.738	253
Mile 139.5 Demps­ ter Hwy, 1900 ft	YT	65.8499	-137.57	579
Mile 24 Wales Hwy,	AK	65.7822	-167.681	10
Prudhoe Bay Rd	AK	65.6719	-149.098	183
Prudhoe Bay Road	AK	65.6675	-149.092	140
Upper Nome River	AK	64.8023	-165.212	110
Mile 60 Dempster Hwy, 3500 ft	YT	64.7722	-138.362	1066
Mile 48.5 Dempster Hwy, North Fork Pass, 4100 ft	YT	64.5701	-138.248	1250
Mile 45 Dempster Hwy, 3500 ft	YT	64.5228	-138.244	1066
Mile 42 Dempster Hwy, North Klondike R, 3300 ft	YT	64.4949	-138.214	1005
Mile 37 Dempster Hwy , 3000 ft	YT	64.4356	-138.265	914
Mile 29.5 Dempster Hwy, 2800 ft	YT	64.3508	-138.417	853
Mile 123 Taylor Hwy	AK	64.1583	-140.549	437
9 mi SW Keno , Hansen Lk	YT	64.1416	-134.895	853
15 mi SW Keno, McQuesten Lk	YT	64.1205	-135.31	666
Mile 32 Taylor Hwy, Mt. Fairplay, 3600 ft,	AK	63.6731	-142.264	1097
Mile 110 Denali Hwy, Seattle Creek	AK	63.3733	-148.363	706
Mile 102 Denali Hwy	AK	63.2899	-148.071	780
Mile 1249 Alaska Hwy, Deadman Lk	AK	63.22	-142.241	504
Alaska Range , Antimony Creek, 2.5 mi E Mile 181, Hwy 3, 3500 ft	AK	63.1071	-149.42	1067
Denali St. Pk, Mtn above Byers Lake, 2500 ft	AK	62.7503	-150.007	762
Denali St . Pk, Byers Lake Cmpgd	AK	62.7443	-150.122	232
Denali St. Pk, Byers Creek at Hwy I	AK	62.7126	-150.205	204
Lower Yukon, Anvik R.	AK	62.6592	-160.217	25
Otter Lake, 130°25' , 4000 ft	YT	62.5077	-130.405	1103
32 mi NW Ft. Simpson, Trail River	NT	62.0716	-122.234	130
Talkeetna Mts. , Hatcher Pass	AK	61.7695	-149.309	900
Hay River	NT	60.838	-115.723	160
Kenai Peninsula, Kalifonsky Beach, nr. Kenai	AK	60.5518	-151.269	26
Kenai Mts, Creek above Tern Lake Cmpgd, 850 ft	AK	60.5303	60.5303	259
Kenai Mts., 8 mi W Cooper Landing, 500 ft	AK	60.4917	-150.049	123
Kenai Mts, 22 mi N Sew ard, 600-800 ft	AK	60.3816	-149.351	213
Kenai Mts, 16 mi N Seward, 500-600 ft	AK	60.2969	-149.353	168
Kenai Peninsula, 8 mi SE Kasilof	AK	60.2298	-151.383	81
Mile 724 Alaska Hwy, Swift River	YT	60.0317	-131.06	902
Kenai Peninsula, Anchor Cmpgd, 12 mi N Homer	AK	59.7611	-151.785	64
Haines Hwy, 3 Guardsmen Pass 3200'	BC	59.5975	-136.46	975
Muncho Lake Pr. Park, N of E entrance	BC	58.9555	-125.763	1020
Mile 392 Alaska Hwy, Summit Lk, 4200 ft	BC	58.6495	-124.716	1280
St. Paul ls.	AK	57.1787	-170.248	50
St. George Is.	AK	56.5817	-169.571	50
Valleyview, 10.VIII.1961	AB	55.0603	-117.308	692
Moose Lk. Prov. Pk, nr Moose Lake, 2 mi N Bonnyville	AB	54.2677	-110.935	549
Unalaska Island , Mt. Makushin	AK	53.8336	-166.882	100
10 mi E Barker­ville, Slide Mt, 6000 ft	BC	53.0721	-121.311	1828
Jasper Nat. Pk, Mt. Edith Cavell, 6000 ft	AB	52.6689	-118.056	1829
Banff Nat. Pk, Sunset Pass, 6400 ft	AB	52.088	-116.895	1951
Banff Nat. Pk, Upper Waterfowl Lk, 5700 ft	AB	51.8356	-116.613	1737
Banff Nat. Pk, Bow Pass, 6800 ft ,	AB	51.7145	-116.489	2073
BanffNat. Pk, Helen Lk, 7800 ft	AB	51.6843	-116.413	2377
Yoho Nat. Pk, Valley of Hagen Peak	BC	51.5847	-116.724	2295
Banff Nat. Pk, Ptarmigan Lk, 7500 ft	AB	51.4846	-116.079	2286
Glacier Nat. Pk, 10 mi E Rogers Pass	BC	51.3825	-117.45	1381
Yoho Nat. Pk, Linda Lk , 6700 ft	BC	51.3692	-116.374	2042
Yoho Nat. Pk, Lake O'Hara, 6700 ft	BC	51.3558	-116.336	2042
Yoho Nat. Pk, Lake Oesa, 7000 ft	BC	51.355	-116.309	2134
Yoho Nat. Pk, Lake McArthur , 7000 ft	BC	51.3286	-116.331	2134
Banff Nat. Pk, Morraine Lk, 6200 ft	AB	51.3261	-116.184	1890
BanffNat. Pk, Eiffel Lk, 7400 ft	AB	51.3231	-116.246	2256
Banff Nat. Pk, Consolation Lk , 6400-7000 ft	AB	51.3156	-116.151	2042
Banff Nat. Pk, Boom Lk, 6000 ft	AB	51.2644	-116.111	1829
Banff Nat. Pk, Smith Lk	AB	51.2507	-115.926	1593
Kananaskis For. Exp. Sta, Lusk Creek	AB	51.0133	-115.002	1550
10 mi SW Kananaskis For. Exp. Sta, Marmot Creek Basin, 6500 ft	AB	50.9023	-115.202	1981
Mt. Begbie, 6200--7000 ft	BC	50.8859	-118.251	1981
20 mi SW Kananaskis For. Exp. Sta, Snow Ridge, 7000 ft	AB	50.7968	-115.354	2134
Kootenay Nat. Pk, Kindersley Pass, 7000 ft	BC	50.671	-115.962	2133
Kootenay Nat. Pk, Sinclair Creek, 6000 ft	BC	50.6665	-115.955	1828
Highwood Pass, Kananaskis 7600 ft	AB	50.597	-114.986	2316
Barkerville, Round Top Mt, 6200 ft	BC	50.1216	-121.316	1889
Alta Lake, 2100 ft	BC	50.1216	-122.981	642
Garibaldi Prov. Pk, Whistler Mt, 6000 ft	BC	50.0629	-122.945	1829
Garibaldi Prov. Pk, Cheakamus Lk, 3000 ft	BC	49.9913	-122.898	914
Garibaldi Prov. Pk, Black Tusk Trail, 5000 ft	BC	49.9191	-122.758	1524
Garibaldi Prov. Pk, Diamond Head Trail , 4000-4500 ft	BC	49.7761	-122.997	1295
20 mi E Hope	BC	49.3946	-120.998	1766
12 mi E Hope	BC	49.401555°	-121.138	1392
Creston	BC	49.1086	-116.461	1790
Waterton Lakes NP, Rowe Creek, 15.VI.1 980 , 6200 ft	AB	49.0501	-114.053	1890
4 mi W Midway	BC	49.0138	-118.847	610
23 mi E Glacier, Austin Pass, Whatcom Co, 4600 ft	WA	48.8515	-121.682	1402
Sagle, Bonner Co	ID	48.2028	-116.563	715
S Fork Hoh River Fossil site	WA	47.8105	-124.003	169
Waha Lk	ID	46.2103	-116.841	1041
Mt. Hood, Government Camp, 3800 ft	OR	45.3015	-121.765	1158
Eagle Cap Prim. Area, Wallawa Co, Moccasin Lk, 7,500 ft	OR	45.2446	-117.461	2286
Eagles Cap Prim. Area, Wallawa Co, 0.5 mi NE Mirror Lk, 7700 ft	OR	45.2423	-117.422	2347
Park Co, Beartooth Prim. Area, Goose Lk, 10,500 ft	MT	45.1144	-109.912	3200
Park Co, 7 mi NE Cooke City, nr Mud lake, 9000 ft	MT	45.0681	-109.838	2743
1 mi SW Beartooth Pass, Shoshone Nat. For, Park Co, 10,500 ft	WY	44.9657	-109.496	3200
Grant Co, S Side Strawberry Mt, 8200 ft	OR	44.31	-118.719	2499
Grant Co, Malheur Nat. For., trail above Strawberry Falls, 7600 ft	OR	44.2963	-118.693	2316
16 mi SSW Spearfish , Little Spearfish Creek, Lawrence Co, 6000 ft	SD	44.2239	-103.979	1829
Three Sisters Prim. Area, Skyline Trail, Wickup Plains, N. Linton Meadows, 5500-6000 ft	OR	44.1484	-121.709	1737
Kimball St. Pk, Wood River Spring, Klamath Co	OR	42.7659	-121.944	1607
Gearhard Mt, Klamath Co, 6500-7200 ft	OR	42.5296	-120.861	2073
Whiskey Creek, mi 39 Hwy 150, Sulphur Cmpgd, Summit Co, 9000 ft	UT	40.7872	-110.884	2743
16 mi W Teds Place, West Fork Sheep Creek, 10,000 ft	CO	40.654	-105.701	3048
10 mi SW Ward , Rainbow Lks, 11,000 ft	CO	40.0122	-105.58	3353
Climax, 11,700 ft	CO	39.2914	-106.251	3566
Mt. Rose , Washoe Co, 8000 ft	NV	39.2783	-119.933	2438
Utah: Mante-La Sal Nat. For, Blue Lk, Grand Co , 2960 m	UT	39.0566	-111.505	2960
Delta Co, For. Rd. 121, 10 km E Hwy 65, nr Park Reservoir , 10,200 ft	CO	39.0458	-107.879	3109
16 mi N Cedaredge, 6 mi E Hwy 65, Peak Reservoi r, Delta Co, 10,000 ft	CO	39.0432	-107.986	3048
Mante-La Sal Nat. For, Warner Cmpgd, 9200 ft	UT	38.5248	-109.276	2800
Mante-La Sal Nat. For. Geyser Pass, Grand Co	UT	38.4858	-109.23	3200
San Francisco Mtns, Mt. Agassiz , 3200 m, Coconino Co	AZ	35.3405	-111.668	3200
		x	y
		68.2222	6		SUMMARY OUTPUT
		66.9666	414
		66.9532	400		Regression Statistics
		66.8011	579		Multiple R	0.836104
		66.5387	258		R Square	0.699069
		66.4433	426		Adjusted R Square	0.696383
		66.1213	201		Standard Error	4.79774
		65.9207	579		Observations	114
		65.8894	253
		65.8499	579		ANOVA
		65.7822	10			df	SS	MS	F	Significance F
		65.6719	183		Regression	1	5988.88	5988.88	260.179	5.57941e-31
		65.6675	140		Residual	112	2578.05	23.0183
		64.8023	110		Total	113	8566.93
		64.7722	1066
		64.5701	1250			Coefficients	Standard Error	t Stat	P-value	Lower 95%	Upper 95%	Lower 95.0%	Upper 95.0%
		64.5228	1066		Intercept	64.6017	0.778676	82.9635	2.12864e-102	63.0588	66.1445	63.0588	66.1445
		64.4949	1005		X Variable 1	-0.00753126	0.000466908	-16.1301	5.57941e-31	-0.00845637	-0.00660614	-0.00845637	-0.00660614
		64.4356	914
		64.3508	853
		64.1583	437
		64.1416	853		RESIDUAL OUTPUT
		64.1205	666
		63.6731	1097		Observation	Predicted Y	Residuals
		63.3733	706		1	64.5565	3.66575
		63.2899	780		2	61.4837	5.48286
		63.22	504		3	61.5892	5.36399
		63.1071	1067		4	60.2411	6.56001
		62.7503	762		5	62.6586	3.88006
		62.7443	232		6	61.3934	5.0499
		62.7126	204		7	63.0879	3.03339
		62.6592	25		8	60.2411	5.67963
		62.5077	1103		9	62.6963	3.19311
		62.0716	130		10	60.2411	5.60881
		61.7695	900		11	64.5264	1.25586
		60.838	160		12	63.2235	2.44846
		60.5518	26		13	63.5473	2.12019
		60.5303	259		14	63.7732	1.02906
		60.4917	123		15	56.5734	8.19883
		60.3816	213		16	55.1876	9.3825
		60.2969	168		17	56.5734	7.94944
		60.2298	81		18	57.0328	7.4621
		60.0317	902		19	57.7181	6.71747
		59.7611	64		20	58.1775	6.17325
		59.5975	975		21	61.3105	2.84774
		58.9555	1020		22	58.1775	5.96408
		58.6495	1280		23	59.5859	4.53462
		57.1787	50		24	56.3399	7.33323
		56.5817	50		25	59.2846	4.08874
		55.0603	692		26	58.7273	4.56259
		54.2677	549		27	60.8059	2.41405
		53.8336	100		28	56.5658	6.54125
		53.0721	1828		29	58.8629	3.88748
		52.6689	1829		30	62.8544	-0.110134
		52.088	1951		31	63.0653	-0.352745
		51.8356	1737		32	64.4134	-1.7542
		51.7145	2073		33	56.2947	6.21297
		51.6843	2377		34	63.6226	-1.55104
		51.5847	2295		35	57.8235	3.94596
		51.4846	2286		36	63.3967	-2.55871
		51.3825	1381		37	64.4059	-3.85406
		51.3692	2042		38	62.6511	-2.12076
		51.3558	2042		39	63.6753	-3.18367
		51.355	2134		40	62.9975	-2.61597
		51.3286	2134		41	63.3364	-3.03954
		51.3261	1890		42	63.9916	-3.76186
		51.3231	2256		43	57.8085	2.22323
		51.3156	2042		44	64.1197	-4.35862
		51.2644	1829		45	57.2587	2.33876
		51.2507	1593		46	56.9198	2.03569
		51.0133	1550		47	54.9617	3.68782
		50.9023	1981		48	64.2251	-7.04641
		50.8859	1981		49	64.2251	-7.64337
		50.7968	2134		50	59.39	-4.32978
		50.671	2133		51	60.467	-6.19933
		50.6665	1828		52	63.8485	-10.0149
		50.597	2316		53	50.8345	2.23758
		50.1216	1889		54	50.827	1.84191
		50.1216	642		55	49.9082	2.17985
		50.0629	1829		56	51.5199	0.315729
		49.9913	914		57	48.9894	2.72516
		49.9191	1524		58	46.6999	4.98441
		49.7761	1295		59	47.3174	4.2673
		49.3946	1766		60	47.3852	4.09936
		49.4016	1392		61	54.201	-2.81847
		49.1086	1790		62	49.2229	2.14634
		49.0501	1890		63	49.2229	2.13297
		49.0138	610		64	48.53	2.82499
		48.8515	1402		65	48.53	2.79862
		48.2028	715		66	50.3676	0.958513
		47.8	169
		46.2103	1041		67	47.6112	3.7119
		45.3015	1158		68	49.2229	2.09278
		45.2446	2286		69	50.827	0.43736
		45.2423	2347		70	52.6044	-1.35373
		45.1144	3200		71	52.9282	-1.9149
		45.0681	2743		72	49.6823	1.22002
		44.9657	3200		73	49.6823	1.20367
		44.31	2499		74	48.53	2.26685
		44.2963	2316		75	48.5375	2.1335
		44.2239	1829		76	50.8345	-0.168087
		44.1484	1737		77	47.1593	3.43771
		42.7659	1607		78	50.3751	-0.253513
		42.5296	2073		79	59.7666	-9.64502
		40.7872	2743		80	50.827	-0.76409
		40.654	3048		81	57.7181	-7.72686
		40.0122	3353		82	53.124	-3.20496
		39.2914	3566		83	54.8487	-5.07256
		39.2783	2438		84	51.3015	-1.90683
		39.0566	2960		85	54.1182	-4.71661
		39.0458	3109		86	51.1207	-2.01213
		39.0432	3048		87	50.3676	-1.31752
		38.5248	2800		88	60.0076	-10.9938
		38.4858	3200		89	54.0429	-5.19133
		35.3405	3200		90	59.2168	-11.0141
					91	56.7616	-10.5514
					92	55.8805	-10.579
					93	47.3852	-2.14063
					94	46.9258	-1.68349
					95	40.5017	4.61275
					96	43.9434	1.12462
					97	40.5017	4.46407
					98	45.7811	-1.47109
					99	47.1593	-2.86297
					100	50.827	-6.60313
					101	51.5199	-7.37146
					102	52.4989	-9.73306
					103	48.9894	-6.45977
					104	43.9434	-3.15627
					105	41.6464	-0.992389
					106	39.3494	0.662784
					107	37.7452	1.54617
					108	46.2405	-6.9622
					109	42.3092	-3.25259
					110	41.187	-2.14115
					111	41.6464	-2.60324
					112	43.5142	-4.98933
					113	40.5017	-2.01587
					114	40.5017	-5.16114
